# Supplementary material for: Ring-opening polymerization of rac-lactide and α-methyltrimethylene carbonate catalyzed by magnesium and zinc complexes derived from binaphthyl-based iminophenolate ligands
Source: Royal Society of Chemistry journal article supplement (doi:10.1039/c5dt00158g), 2015-01-01
Supplement: c5dt00158g1.pdf [file c5dt00158g1.pdf]

## Supporting Information for

### Ring-Opening Polymerization of *rac*-Lactide and $\alpha$ -Methyltrimethylene Carbonate Catalyzed by Magnesium and Zinc Complexes Derived from Binaphthyl-based Iminophenolate Ligands

Miao Huang, Chen Pan and Haiyan Ma\*

*Shanghai Key Laboratory of Functional Materials Chemistry and Laboratory of Organometallic Chemistry, East China University of Science and Technology, 130 Meilong Road, Shanghai 200237, P. R. China.*

\* To whom correspondence should be addressed. Tel./Fax: +86 21 64253519. E-mail:

[haiyanma@ecust.edu.cn](mailto:haiyanma@ecust.edu.cn).

#### Contents:

**Table S1.** Chemical shifts of Ar-NMe<sub>2</sub> resonances in the <sup>1</sup>H NMR spectra of complexes **4a**-**6a**, **4b** and corresponding proligands.

**Table S2.** Crystallographic data for **4a**, **4b** and **5b'**.

**Figure S1.** ORTEP diagram of the molecular structure of  $[(L^5)Zn(5b')]$ .

**Figure S2.** A)  $^1H$  NMR spectrum of magnesium complex **4a** in  $C_6D_6$ , one tiny drop of THF was added; B)  $^1H$  NMR spectrum of complex **4a** in  $C_6D_6$ ; C)  $^1H$  NMR spectrum of free ligand **L<sup>4</sup>H** in  $C_6D_6$  (400 MHz).

**Figure S3.** A)  $^1H$  NMR spectrum of zinc complex **4b** in  $C_6D_6$ , one tiny drop of THF was added; B)  $^1H$  NMR spectrum of complex **4b** in  $C_6D_6$ ; C)  $^1H$  NMR spectrum of free ligand **L<sup>4</sup>H** in  $C_6D_6$  (400 MHz).

**Figure S4.** The variable temperature  $^1H$  NMR spectra of complex **4a**.

**Figure S5.** The variable temperature  $^1H$  NMR spectra of complex **4a** at  $-60\text{ }^\circ\text{C}$  and  $-30\text{ }^\circ\text{C}$ .

**Figure S6.** The variable temperature  $^1H$  NMR spectra of complex **4a** with 2 equiv. of THF.

**Figure S7.** The variable temperature  $^1H$  NMR spectra of complex **4a** with 2.0 equiv. of THF at  $-45\text{ }^\circ\text{C}$  and  $30\text{ }^\circ\text{C}$ .

**Figure S8.** A)  $^1H$  NMR spectrum of free ligand **L<sup>4</sup>H**; B)  $^1H$  NMR spectrum of complex **4a**; C)  $^1H$  NMR spectrum of the reaction mixture between complex **4a** and one equiv. of 2-propanol.

**Figure S9.**  $^1H$  NMR spectrum of the reaction mixture between complex **4a** and one equiv. of 2-propanol.

**Figure S10.** Kinetics of *rac*-LA polymerization initiated by complexes **4a-6a**/*i*PrOH in toluene.

**Figure S11.** Kinetics of the ROP of *rac*-LA initiator by [**4a**]/[*i*PrOH] in toluene.

**Figure S12.** Plot of  $k_{app}$  versus the concentration of **4a** for *rac*-LA polymerization initiated by **4a**/2-propanol.

**Figure S13.** A)  $^1\text{H}$  NMR spectrum of *rac*-lactide oligomer obtained by complex **4a**/ $^i\text{PrOH}$  system; B)  $^1\text{H}$  NMR spectrum of complex **4a**; C)  $^1\text{H}$  NMR spectrum of free ligand **L<sup>4</sup>H**.

**Figure S14.**  $^1\text{H}$  NMR spectrum of *rac*-lactide oligomer obtained by complex **4a**/ $^i\text{PrOH}$  system.

**Figure S15.**  $^1\text{H}$  NMR spectrum of polymer sample obtained from the **4a**-isopropanol system.

**Figure S16.** ESI-TOF mass spectrum of the *rac*-LA oligomer obtained with **4a** ( $[\text{rac-LA}]_0 : [\text{4a}]_0 : [^i\text{PrOH}]_0 = 20:1:1$ , in THF).

**Figure S17.** Homonuclear decoupled  $^1\text{H}$  NMR spectrum of PLA produced from *rac*-lactide using **4b** as initiator.

**Figure S18.** Details of the carbonyl region of the  $^{13}\text{C}\{^1\text{H}\}$  NMR spectra of poly( $\alpha$ -MeTMC) obtained by **4a**, **5a**, **6a**, **4b**.

**Figure S19.** The DSC curves of poly( $\alpha$ -MeTMC) produced from  $\alpha$ -MeTMC using **4b** as initiator.

**Table S1.** Chemical shifts of Ar-NMe<sub>2</sub> resonances in the  $^1\text{H}$  NMR spectra of complexes **4a**-**6a**, **4b** and corresponding proligands <sup>a</sup>

| Complex   | Ar-N(CH <sub>3</sub> ) <sub>2</sub> |                                                     | Ligand                | Ar- N(CH <sub>3</sub> ) <sub>2</sub> |
|-----------|-------------------------------------|-----------------------------------------------------|-----------------------|--------------------------------------|
|           | C <sub>6</sub> D <sub>6</sub>       | C <sub>6</sub> D <sub>6</sub> with THF <sup>b</sup> |                       | C <sub>6</sub> D <sub>6</sub>        |
| <b>4a</b> | 2.26 (s)                            | 2.16 (s)                                            | <b>L<sup>4</sup>H</b> | 2.21                                 |
| <b>5a</b> | 2.25 (s)                            | 2.20 (s)                                            | <b>L<sup>5</sup>H</b> | 2.20                                 |

|           |          |          |                       |      |
|-----------|----------|----------|-----------------------|------|
| <b>6a</b> | 2.25 (s) | 2.23 (s) | <b>L<sup>6</sup>H</b> | 2.22 |
| <b>4b</b> | 1.98 (s) | 2.03 (s) | <b>L<sup>4</sup>H</b> | 2.21 |

<sup>a</sup>: In ppm, C<sub>6</sub>D<sub>6</sub>, 400 MHz, 25 °C; <sup>b</sup>: One tiny drop of THF was added to the solution of metal complex in C<sub>6</sub>D<sub>6</sub>.

**Table S2.** Crystallographic data for **4a**, **4b** and **5b'**

|                   | <b>4a</b>                                                         | <b>4b</b>                                                          | <b>5b'</b>                                                        |
|-------------------|-------------------------------------------------------------------|--------------------------------------------------------------------|-------------------------------------------------------------------|
| Empirical formula | C <sub>53</sub> H <sub>61</sub> MgN <sub>3</sub> OSi <sub>2</sub> | C <sub>53</sub> H <sub>61</sub> N <sub>3</sub> OSi <sub>2</sub> Zn | C <sub>105</sub> H <sub>86</sub> N <sub>4</sub> O <sub>2</sub> Zn |
| Formula weight    | 836.54                                                            | 877.60                                                             | 1501.15                                                           |
| Temp (K)          | 293(2)                                                            | 293(2)                                                             | 140(2)                                                            |
| Crystal size (mm) | 0.213 x 0.147 x 0.123                                             | 0.267 x 0.211 x 0.147                                              | 0.16 x 0.12 x 0.10                                                |
| Crystal system    | Monoclinic                                                        | Triclinic                                                          | Triclinic                                                         |

|                                                                                   |                                |                     |                     |
|-----------------------------------------------------------------------------------|--------------------------------|---------------------|---------------------|
| Space group                                                                       | P2(1)/n                        | P-1                 | P-1                 |
| <i>a</i> (Å)                                                                      | 13.584(9)                      | 9.1425(8)           | 14.188(2)           |
| <i>b</i> (Å)                                                                      | 14.016(9)                      | 14.6284(12)         | 14.372(2)           |
| <i>c</i> (Å)                                                                      | 26.244(19)                     | 18.6227(16)         | 24.466(5)           |
| $\alpha$ (°)                                                                      | 90                             | 83.526(2)           | 103.998(5)          |
| $\beta$ (°)                                                                       | 99.684(12)                     | 88.281(2)           | 95.315(5)           |
| $\gamma$ (°)                                                                      | 90                             | 87.762(2)           | 112.577(3)          |
| Volume (Å <sup>3</sup> )                                                          | 4925(6)                        | 2472.0(4)           | 4373.0(14)          |
| <i>Z</i>                                                                          | 4                              | 2                   | 2                   |
| Density <sub>cal</sub> (mg/m <sup>3</sup> )                                       | 1.128                          | 1.179               | 1.140               |
| Abs coeff (mm <sup>-1</sup> )                                                     | 0.124                          | 0.584               | 0.332               |
| <i>F</i> (000)                                                                    | 1792                           | 932                 | 1580                |
| $\theta$ range (°)                                                                | 1.57 to 25.50                  | 1.68 to 26.00       | 0.88 to 26.00       |
| Data collected ( <i>hkl</i> )                                                     | −9 to 16, −15 to 16, −28 to 31 | ±11, −18 to 13, ±22 | ±17, ±17, −24 to 30 |
| Reflns collected/unique                                                           | 26959 / 9012                   | 15166 / 9707        | 31704 / 17112       |
| <i>R</i> (int)                                                                    | 0.2455                         | 0.0295              | 0.0748              |
| Max. and min. transmn                                                             | 1.00000 and 0.23415            | 1.00000 and 0.14173 | 0.9675 and 0.9488   |
| Data/restraints/para                                                              | 9012 / 0 / 554                 | 9707 / 0 / 553      | 17112 / 618 / 1016  |
| Goodness-of-fit on <i>F</i> <sup>2</sup>                                          | 0.826                          | 1.010               | 0.977               |
| Final <i>R</i> <sub>1</sub> , <i>wR</i> <sub>2</sub> [ <i>I</i> > 2σ( <i>I</i> )] | 0.0774, 0.1136                 | 0.0530, 0.1352      | 0.0724, 0.1861      |
| <i>R</i> <sub>1</sub> , <i>wR</i> <sub>2</sub> (all data)                         | 0.3055, 0.1785                 | 0.0791, 0.1534      | 0.1262, 0.2214      |
| Δρ <sub>max, min</sub> /e Å <sup>-3</sup>                                         | 0.200 and −0.234               | 0.522 and −0.309    | 0.529 and −0.497    |

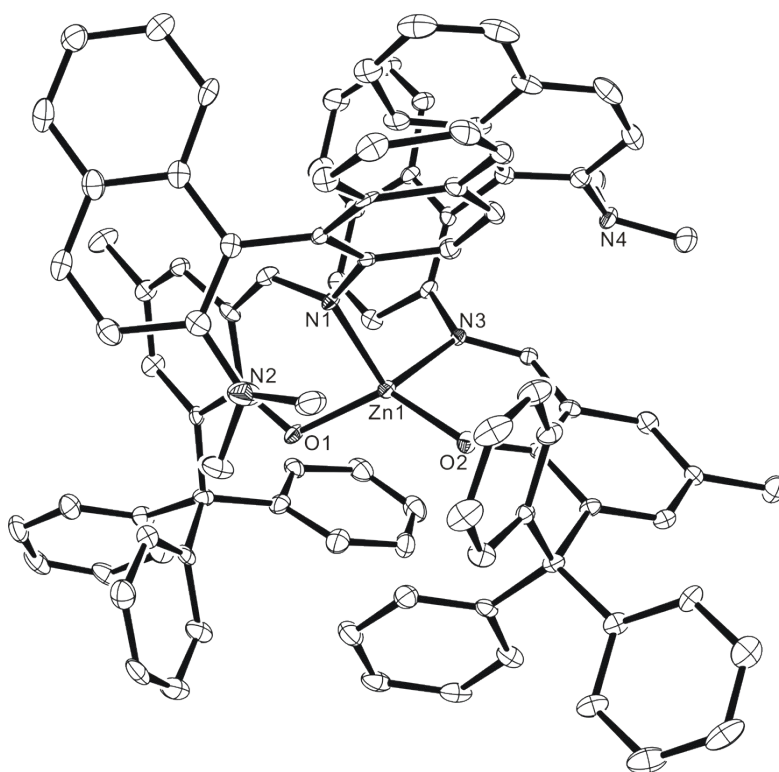

**Figure S1.** ORTEP diagram of the molecular structure of  $[(L^5)Zn (5b')]$ . Thermal ellipsoids are drawn at the 30% probability level. Selected bond lengths (Å) and angle (°): Zn1–O2 1.885(3), Zn1–O1 1.923(3), Zn1–N1 2.023(3), Zn1–N3 2.062(4), O1–Zn1–N1 94.0(14), O1–Zn1–N3 119.0(14), N1–Zn1–N3 104.8(14), O1–Zn1–O2 125.9(13), N1–Zn1–O2 117.8(13), N3–Zn1–O2 95.1(14).

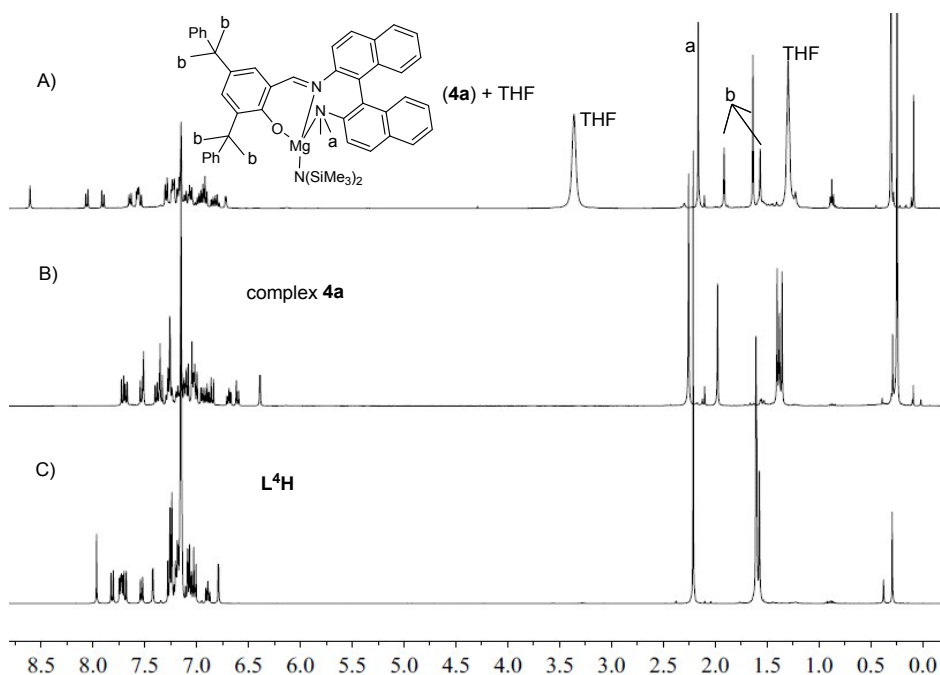

**Figure S2.** A)  $^1\text{H}$  NMR spectrum of magnesium complex **4a** in  $\text{C}_6\text{D}_6$ , one tiny drop of THF was added; B)  $^1\text{H}$  NMR spectrum of complex **4a** in  $\text{C}_6\text{D}_6$ ; C)  $^1\text{H}$  NMR spectrum of free ligand **L<sup>4</sup>H** in  $\text{C}_6\text{D}_6$  (400 MHz).

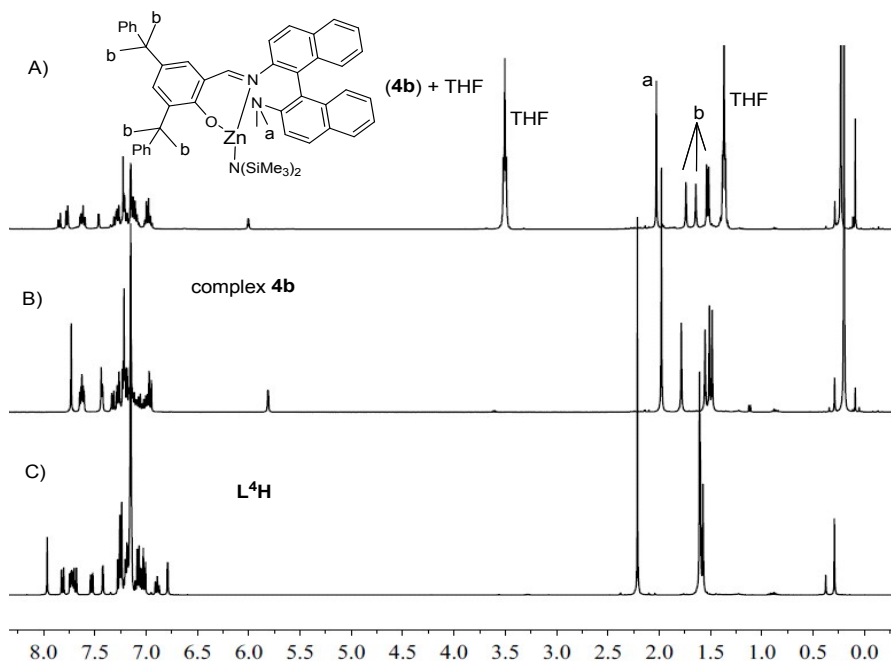

**Figure S3.** A)  $^1\text{H}$  NMR spectrum of zinc complex **4b** in  $\text{C}_6\text{D}_6$ , one tiny drop of THF was added; B)  $^1\text{H}$  NMR spectrum of complex **4b** in  $\text{C}_6\text{D}_6$ ; C)  $^1\text{H}$  NMR spectrum of free ligand **L<sup>4</sup>H** in  $\text{C}_6\text{D}_6$  (400 MHz).

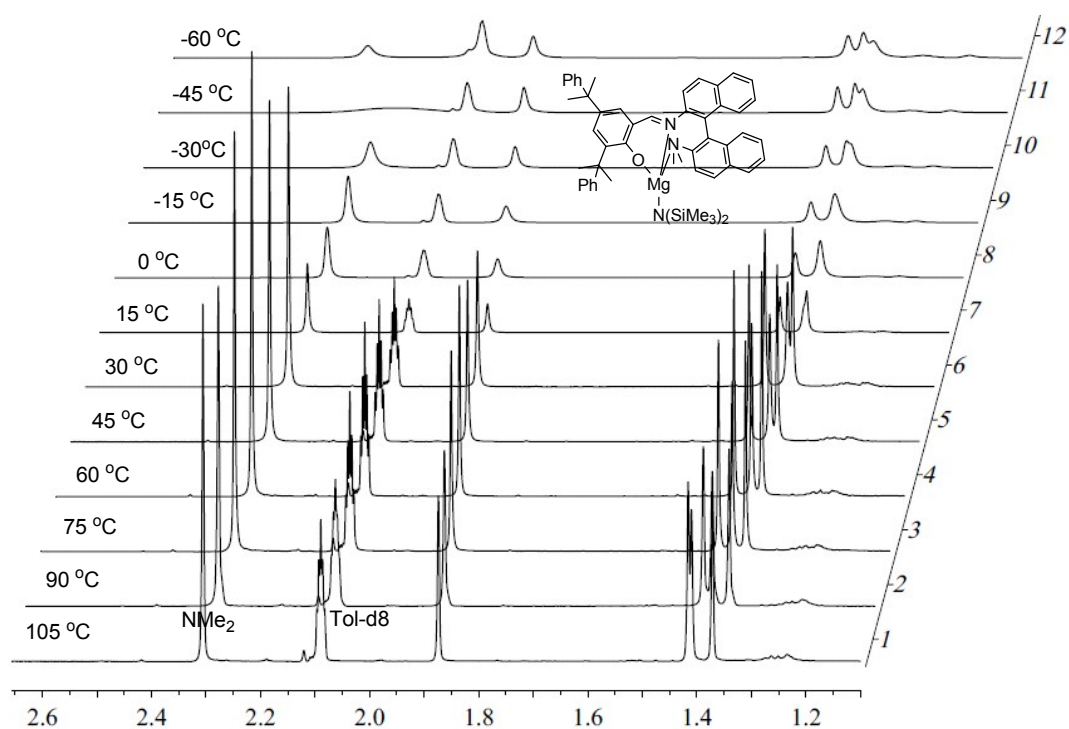

**Figure S4.** The variable temperature  $^1\text{H}$  NMR spectra of complex **4a** (toluene- $d_8$ , 400 MHz; partial signals are shown).

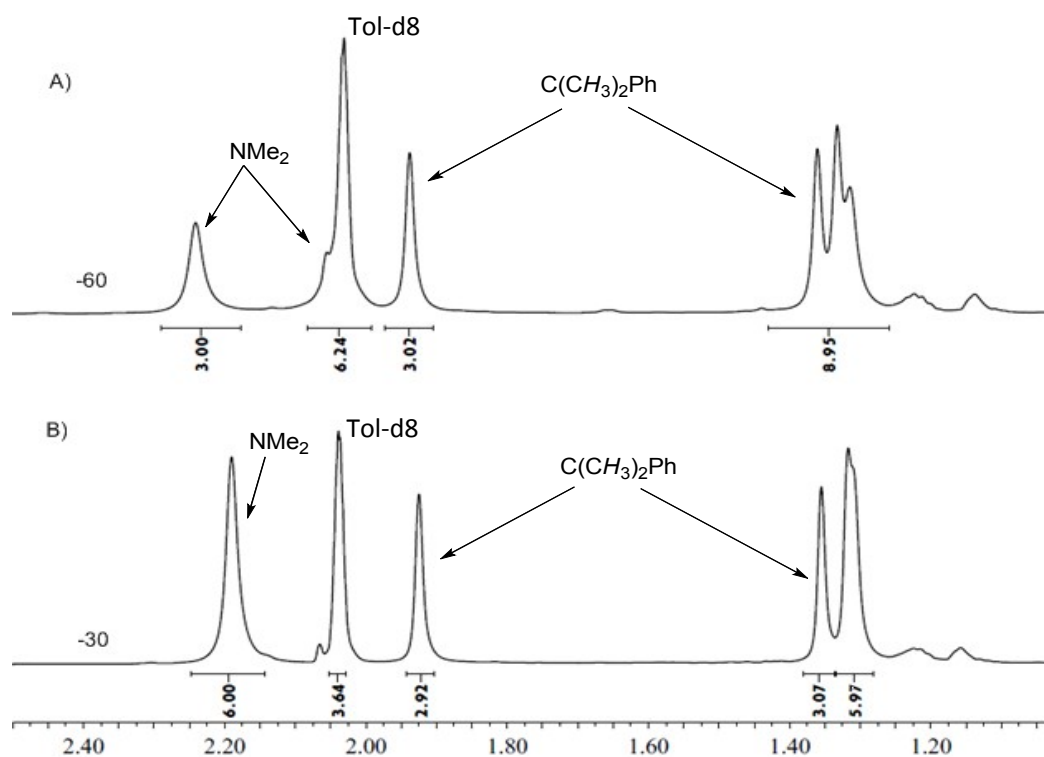

**Figure S5.** The variable temperature  $^1\text{H}$  NMR spectra of complex **4a** at  $-60\text{ }^\circ\text{C}$  and  $-30\text{ }^\circ\text{C}$  (toluene- $d_8$ , 400 MHz; partial signals are shown).



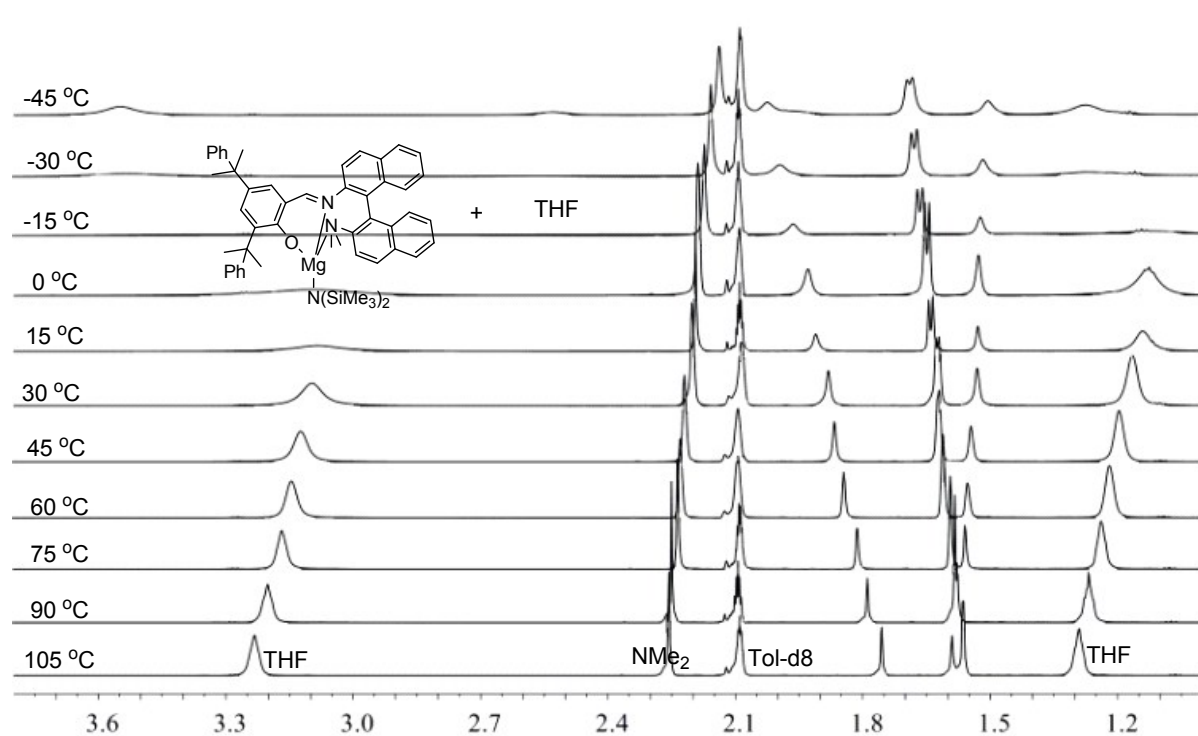

**Figure S6.** The variable temperature  $^1\text{H}$  NMR spectra of complex **4a** with 2 equiv. of THF (toluene- $d_8$ , 400 MHz; partial signals are shown).

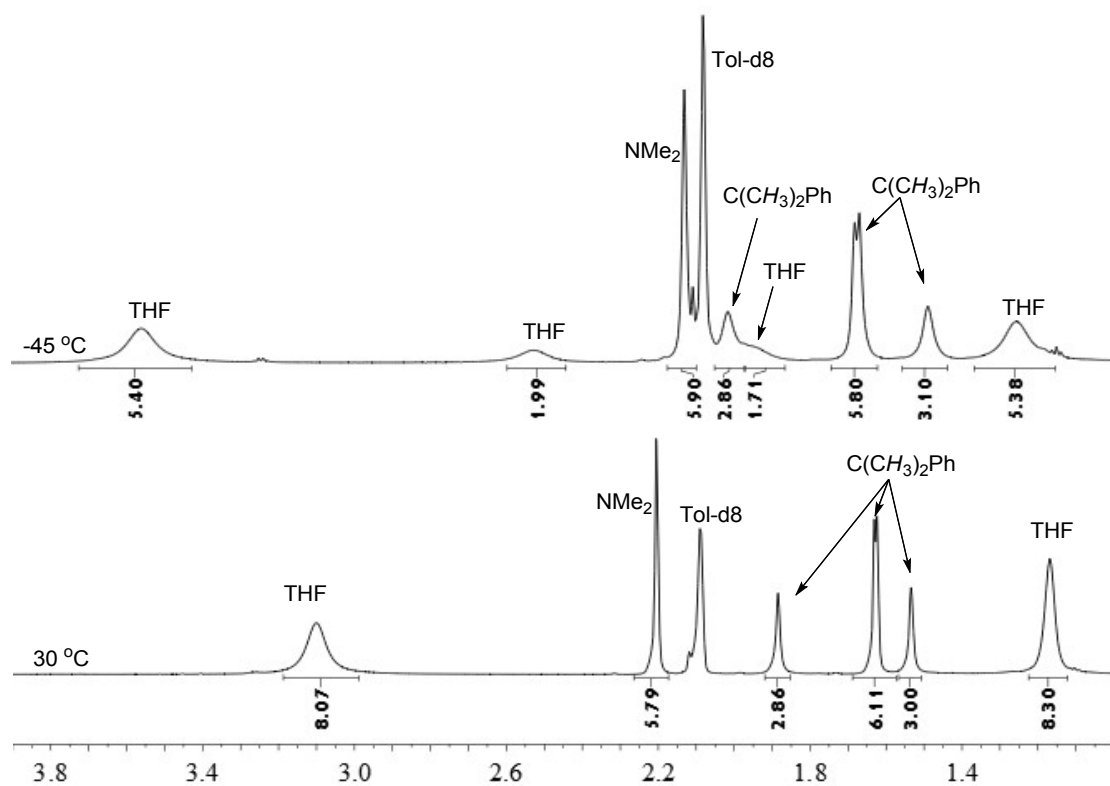

**Figure S7.** The variable temperature  $^1\text{H}$  NMR spectra of complex **4a** with 2 equiv. of THF at  $-45\text{ }^\circ\text{C}$  and  $30\text{ }^\circ\text{C}$  (toluene- $d_8$ , 400 MHz; partial signals are shown).

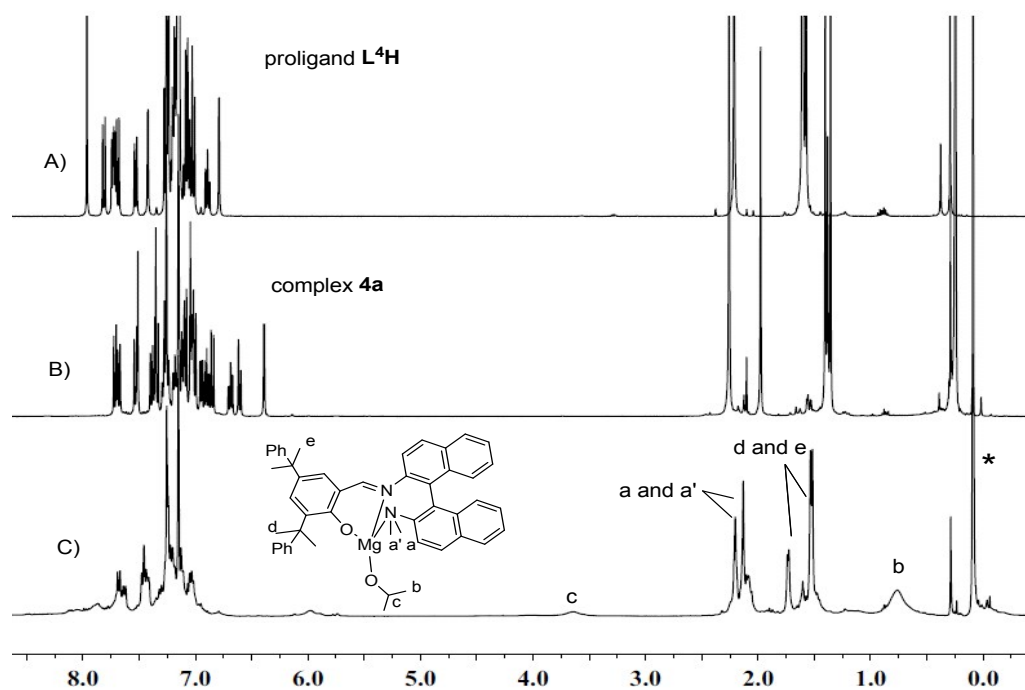

**Figure S8.** A)  $^1\text{H}$  NMR spectrum of free ligand  $\text{L}^4\text{H}$  in  $\text{C}_6\text{D}_6$ ; B)  $^1\text{H}$  NMR spectrum of complex  $\text{4a}$  in  $\text{C}_6\text{D}_6$ ; C)  $^1\text{H}$  NMR spectrum of the reaction mixture between complex  $\text{4a}$  and one equiv. of 2-propanol ( $\text{C}_6\text{D}_6$ , 400 MHz, \*,  $\text{HN}(\text{SiMe}_3)_2$ ).

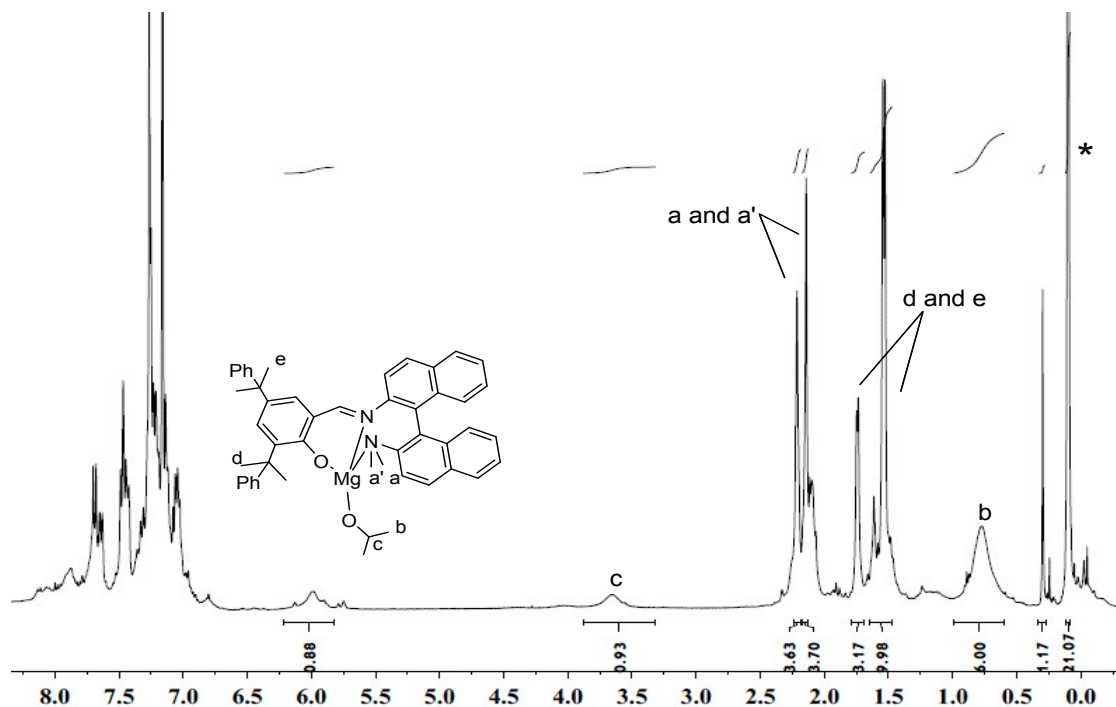

**Figure S9.**  $^1\text{H}$  NMR spectrum of the reaction mixture between complex  $\text{4a}$  and one equiv. of 2-propanol ( $\text{C}_6\text{D}_6$ , 400 MHz; \*,  $\text{HN}(\text{SiMe}_3)_2$ ).

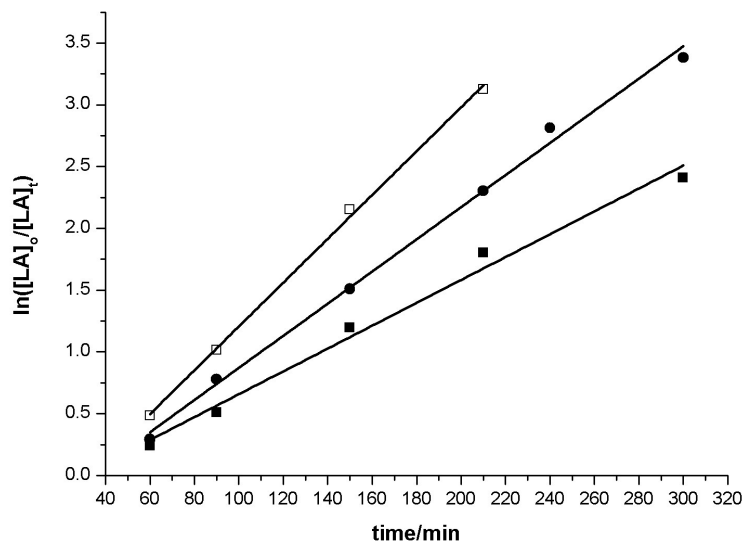

**Figure S10.** Kinetics of *rac*-LA polymerization initiated by complexes **4a-6a**/*i*PrOH in toluene with  $[rac-LA]_0 = 1 \text{ mol/L}$ , 25 °C. □:  $[rac-LA]_0/[4a]_0/[iPrOH]_0 = 200/1/1$ ,  $k_{app} = 0.018 \text{ min}^{-1}$ ; ●:  $[rac-LA]_0/[5a]_0/[iPrOH]_0 = 200/1/1$ ,  $k_{app} = 0.013 \text{ min}^{-1}$ ; ■:  $[rac-LA]_0/[6a]_0/[iPrOH]_0 = 200/1/1$ ,  $k_{app} = 0.0093 \text{ min}^{-1}$ .

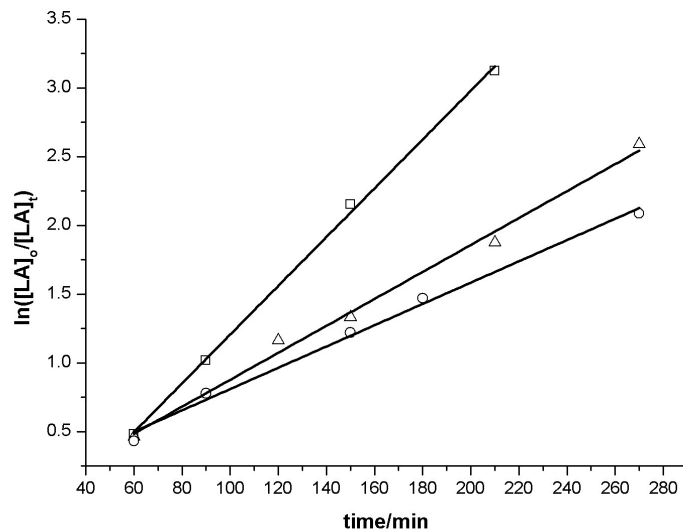

**Figure S11.** Kinetics of *rac*-LA polymerization initiated by **4a**/*i*PrOH in toluene at 25 °C with  $[LA] = 1 \text{ mol}\cdot\text{L}^{-1}$  (□:  $[rac-LA]_0/[4a]_0/[iPrOH] = 200/1/1$ ,  $k_{app} = 0.0177 \text{ min}^{-1}$ ; Δ:  $[rac-LA]_0/[4a]_0/[iPrOH] = 400/1/1$ ,  $k_{app} = 0.00959 \text{ min}^{-1}$ ; ○:  $[rac-LA]_0/[4a]_0/[iPrOH] = 500/1/1$ ,  $k_{app} = 0.0078 \text{ min}^{-1}$ ).

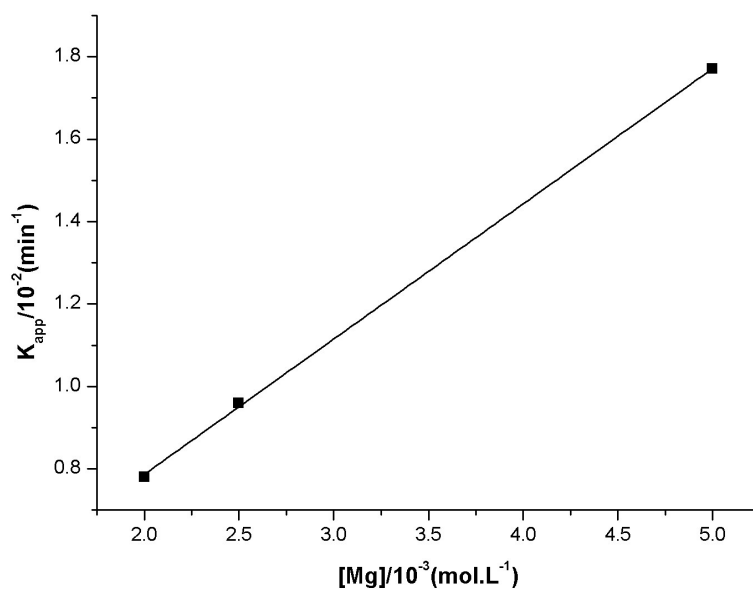

**Figure S12.** Plot of  $k_{app}$  versus the concentration of **4a** for *rac*-LA polymerization at 25 °C in toluene by **4a**/2-propanol ( $[rac\text{-LA}] = 1 \text{ mol}\cdot\text{L}^{-1}$ ,  $k_p = 3.52 \text{ L}\cdot\text{mol}^{-1}\cdot\text{min}^{-1}$ ).

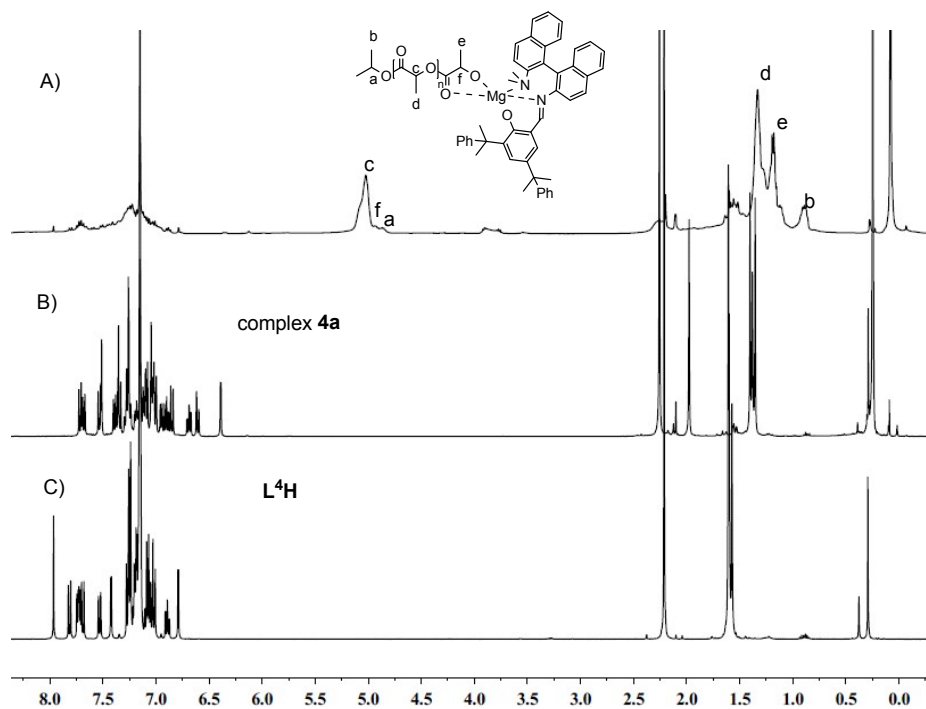

**Figure S13.** A) <sup>1</sup>H NMR spectrum of active *rac*-lactide oligomer obtained by complex **4a**/<sup>i</sup>PrOH system ( $[rac\text{-LA}]_0 : [\text{Mg}]_0 : [^i\text{PrOH}]_0 = 20:1:1$ , at 25 °C); B) <sup>1</sup>H NMR spectrum of complex **4a**; C) <sup>1</sup>H NMR spectrum of free ligand **L<sup>4</sup>H** (C<sub>6</sub>D<sub>6</sub>, 400 MHz).

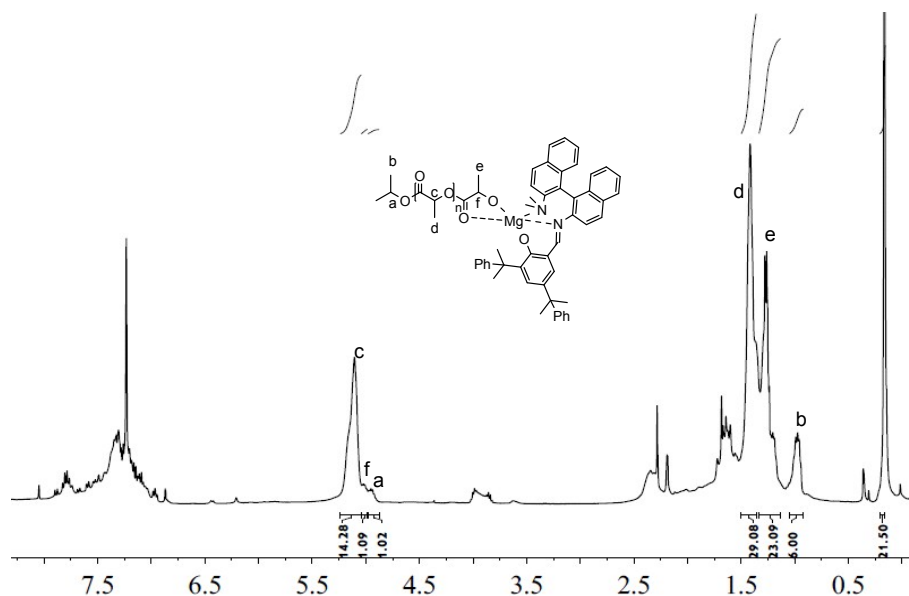

**Figure S14.**  $^1\text{H}$  NMR spectrum of active *rac*-lactide oligomer obtained by complex **4a**/ $i$ PrOH system ( $\text{C}_6\text{D}_6$ , 400 MHz;  $[\text{rac-LA}]_0 : [\text{Mg}]_0 : [i\text{PrOH}]_0 = 20:1:1$ , at 25  $^\circ\text{C}$ ).

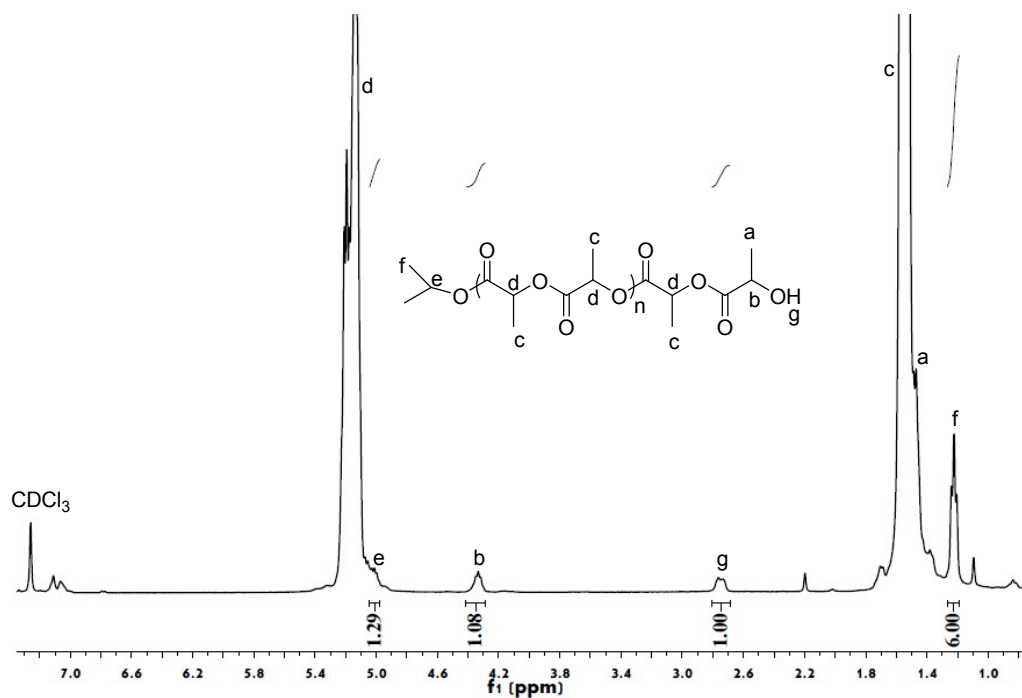

**Figure S15.**  $^1\text{H}$  NMR spectrum of typical polymer sample obtained by **4a**/isopropanol system with  $[\text{rac-LA}]/[\text{4a}]/[i\text{PrOH}] = 20 : 1 : 1$  at 25  $^\circ\text{C}$  in THF.

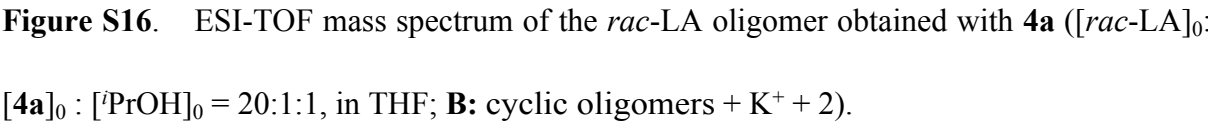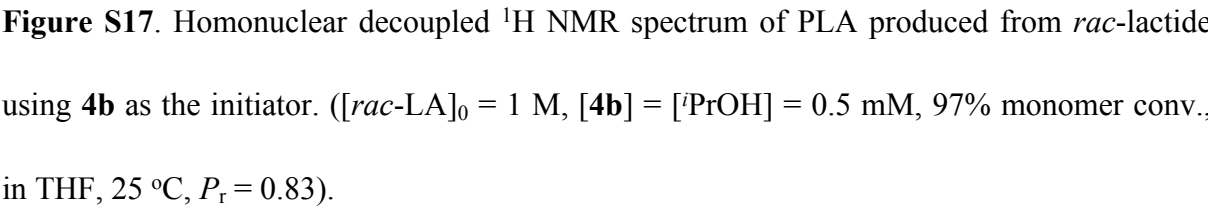

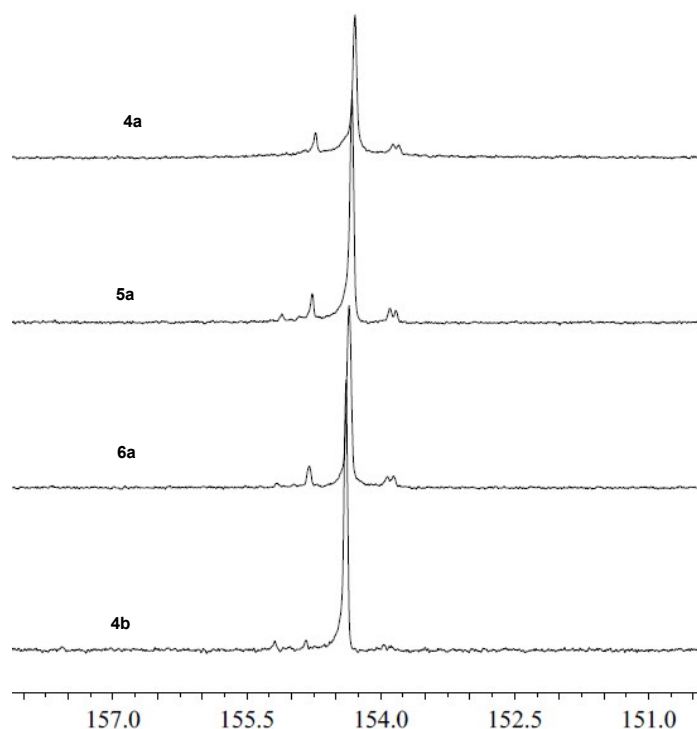

**Figure S18.** Details of the carbonyl region of the  $^{13}\text{C}\{^1\text{H}\}$  NMR spectra (100 MHz,  $\text{CDCl}_3$ , 25  $^\circ\text{C}$ ) of poly( $\alpha$ -MeTMC)s: **4a** (Table 3, Run 1) ( $X_{\text{reg}} = \text{ca. } 0.78$ ), **5a** (Table 3, Run 2) ( $X_{\text{reg}} = \text{ca. } 0.83$ ), **6a** (Table 3, Run 3) ( $X_{\text{reg}} = \text{ca. } 0.82$ ), **4b** (Table 3, run 4) ( $X_{\text{reg}} = \text{ca. } 0.98$ ).

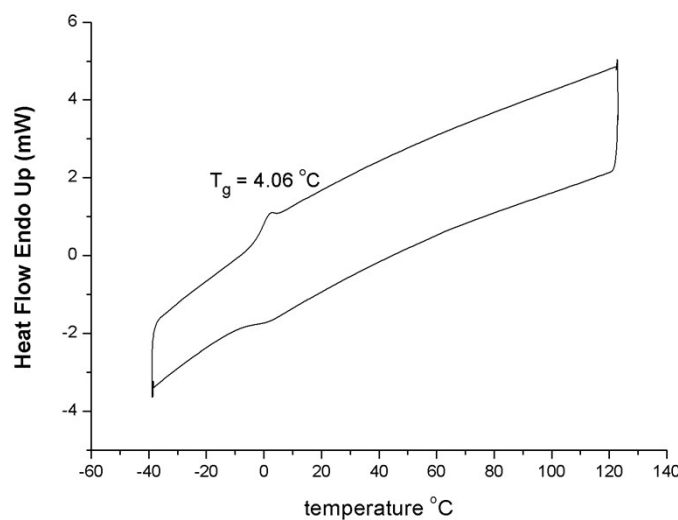

**Figure S19.** The DSC curves of poly( $\alpha$ -MeTMC) produced from  $\alpha$ -MeTMC using **4b** as the initiator ( $[\alpha\text{-MeTMC}]_0 = 1 \text{ M}$ ,  $[\mathbf{4b}] = 0.5 \text{ mM}$ , 90% monomer conv., in toluene, 25  $^\circ\text{C}$ ,  $T_g = 4.06 \text{ }^\circ\text{C}$ ).
